# Supplementary material for: Impact of Cellular miRNAs on Circulating miRNA Biomarker Signatures
Source: PLoS One. 2011 Jun 17;6(6):e20769. doi: 10.1371/journal.pone.0020769 (PMC3117799; doi:10.1371/journal.pone.0020769)
Supplement: Table S1 — List of experimental datasets. (XLSX) [file pone.0020769.s006.xlsx]

## Sheet: Sheet1
Table S1. List of datasets
Notation:	CS--CloudySup, P1--Pellet 1, S1--Supernatant 1, P2--Pellet 2, S2--Supernatant 2, L--Leukocytes, W--White Blood Cells, R--Red Blood Cells
sample size (Fractionation):	CS (5), P1 (10), S1 (10), P2 (3), S2 (3), L (5), W (3), R (4)
sample size (Variability):	S1 from Males (8) and S1 from Females (10)
Dataset	class	ID	Sex	Ethnicity	Amount of RNA hybridized	CEL Filename
Fractionation	CS	W070510201961/W070510201962/W070510201963	male	Caucasian	800ng	20100915_RD_Fractionation_A_Plasma_RNA_800ng_B1_T1
Fractionation	CS	50	male	Caucasian	800ng	20100915_RD_Fractionation_14_Plasma_RNA_800ng_B1_T1
Fractionation	CS	3	male	Caucasian	800ng	20100915_RD_Fractionation_15_Plasma_RNA_800ng_B1_T1
Fractionation	CS	W070510713293/W070510713294	male	Caucasian	500ng	20100923_RD_Fractionation_9394CS_Plasma_RNA_500ng_B1_T1
Fractionation	CS	W070510713295/W070510713296	male	Caucasian	500ng	20100923_RD_Fractionation_9596CS_Plasma_RNA_500ng_B1_T1
Fractionation	P1	W070510201961/WW070510201962/W070510201963	male	Caucasian	800ng	20100915_RD_Fractionation_C_Plasma_RNA_800ng_B1_T1
Fractionation	P1	3	male	Caucasian	800ng	20100915_RD_Fractionation_12_Plasma_RNA_800ng_B1_T1
Fractionation	P1	W070510201724	male	Caucasian	500ng	20100812_RD_SBCMC4_Galaxy_Plasma_RNA_500ng_B1_T1
Fractionation	P1	W070510202832	male	Caucasian	500ng	20100812_RD_SBCMC8_Galaxy_Plasma_RNA_500ng_B1_T1
Fractionation	P1	W070510213718	male	Caucasian	500ng	20100812_RD_SBCMC11_Galaxy_Plasma_RNA_500ng_B1_T1
Fractionation	P1	W070510412835	male	Caucasian	500ng	20100812_RD_SBCMC14_Galaxy_Plasma_RNA_500ng_B1_T1
Fractionation	P1	W070510412834	male	Caucasian	500ng	20100824_RD_SBCMC16_Galaxy_Plasma_RNA_500ng_B1_T1
Fractionation	P1	W070510412840	male	Caucasian	500ng	20100824_RD_SBCMC18_Galaxy_Plasma_RNA_500ng_B1_T1
Fractionation	P1	W070510713293/W070510713294	male	Caucasian	500ng	20100923_RD_Fractionation_9394P1_Plasma_RNA_500ng_B1_T1
Fractionation	P1	W070510713295/W070510713296	male	Caucasian	500ng	20100923_RD_Fractionation_9596P1_Plasma_RNA_500ng_B1_T1
Fractionation	S1	W070510201961/W070510201962/W070510201963	male	Caucasian	800ng	20100915_RD_Fractionation_B_Plasma_RNA_800ng_B1_T1
Fractionation	S1	3	male	Caucasian	800ng	20100915_RD_Fractionation_9_Plasma_RNA_800ng_B1_T1
Fractionation	S1	W070510201724	male	Caucasian	500ng	20100812_RD_SBCMC2_Galaxy_Plasma_RNA_500ng_B1_T1
Fractionation	S1	W070510202832	male	Caucasian	500ng	20100812_RD_SBCMC6_Galaxy_Plasma_RNA_500ng_B1_T1
Fractionation	S1	W070510213718	male	Caucasian	500ng	20100812_RD_SBCMC9_Galaxy_Plasma_RNA_500ng_B1_T1
Fractionation	S1	W070510412835	male	Caucasian	500ng	20100812_RD_SBCMC12_Galaxy_Plasma_RNA_500ng_B1_T1
Fractionation	S1	W070510412834	male	Caucasian	500ng	20100824_RD_SBCMC15_Galaxy_Plasma_RNA_500ng_B1_T1
Fractionation	S1	W070510412840	male	Caucasian	500ng	20100824_RD_SBCMC17_Galaxy_Plasma_RNA_500ng_B1_T1
Fractionation	S1	W070510713293/W070510713294	male	Caucasian	500ng	20100923_RD_Fractionation_9394S1_Plasma_RNA_500ng_B1_T1
Fractionation	S1	W070510713295/W070510713296	male	Caucasian	500ng	20100923_RD_Fractionation_9596S1_Plasma_RNA_500ng_B1_T1
Fractionation	P2	W070510201961/W070510201962/W070510201963	male	Caucasian	800ng	20100915_RD_Fractionation_E_Plasma_RNA_800ng_B1_T1
Fractionation	P2	W070510713293/W070510713294	male	Caucasian	500ng	20100923_RD_Fractionation_9394P2_Plasma_RNA_500ng_B1_T1
Fractionation	P2	W070510713295/W070510713296	male	Caucasian	500ng	20100923_RD_Fractionation_9596P2_Plasma_RNA_500ng_B1_T1
Fractionation	S2	W070510201961/W070510201962/W070510201963	male	Caucasian	800ng	20100915_RD_Fractionation_D_Plasma_RNA_800ng_B1_T1
Fractionation	S2	W070510713293/W070510713294	male	Caucasian	500ng	20100923_RD_Fractionation_9394S2_Plasma_RNA_500ng_B1_T1
Fractionation	S2	W070510713295/W070510713296	male	Caucasian	500ng	20100923_RD_Fractionation_9596S2_Plasma_RNA_500ng_B1_T1
Fractionation	L	N/A	male	Caucasian	1000ng	10-0506_JB_(miRNA-1_0_2x)
Fractionation	L	N/A	Female	Caucasian	1000ng	10-0507_JB_(miRNA-1_0_2x)
Fractionation	L	N/A	Female	Caucasian	1000ng	10-0508_JB_(miRNA-1_0_2x)
Fractionation	L	N/A	Female	Caucasian	1000ng	10-0509_JB_(miRNA-1_0_2x)
Fractionation	L	N/A	male	Caucasian	1000ng	10-0510_JB_(miRNA-1_0_2x)
Fractionation	W	4	male	Caucasian	800ng	20100915_RD_Fractionation_4_Plasma_RNA_800ng_B1_T1
Fractionation	W	6	male	Caucasian	800ng	20100915_RD_Fractionation_6_Plasma_RNA_800ng_B1_T1
Fractionation	W	W070510201961/W070510201962/W070510201963	male	Caucasian	800ng	20100923_RD_Fractionation_F_Plasma_RNA_800ng_B1_T1
Fractionation	R	W070510201961/W070510201962/W070510201963	male	Caucasian	800ng	20100915_RD_Fractionation_G_Plasma_RNA_800ng_B1_T1
Fractionation	R	4	male	Caucasian	800ng	20100915_RD_Fractionation_1_Plasma_RNA_800ng_B1_T1
Fractionation	R	6	male	Caucasian	800ng	20100915_RD_Fractionation_2_Plasma_RNA_800ng_B1_T1
Fractionation	R	50	male	Caucasian	800ng	20100915_RD_Fractionation_3_Plasma_RNA_800ng_B1_T1
Variability	S1	W070510990409	male	Caucasian	500ng	20101112_RD_MaleVar_09M_Plasma_RNA_500ng_B1_T1
Variability	S1	W070510990410	male	Caucasian	500ng	20101112_RD_MaleVar_10M_Plasma_RNA_500ng_B1_T1
Variability	S1	W070510990411	male	Caucasian	500ng	20101112_RD_MaleVar_11M_Plasma_RNA_500ng_B1_T1
Variability	S1	W070510202436	male	Caucasian	500ng	20101112_RD_MaleVar_36M_Plasma_RNA_500ng_B1_T1
Variability	S1	W070510990583	male	Caucasian	500ng	20101112_RD_MaleVar_83M_Plasma_RNA_500ng_B1_T1
Variability	S1	W070510990584	male	Caucasian	500ng	20101112_RD_MaleVar_84M_Plasma_RNA_500ng_B1_T1
Variability	S1	W070510990585	male	Caucasian	500ng	20101112_RD_MaleVar_85M_Plasma_RNA_500ng_B1_T1
Variability	S1	W070510214886	male	Caucasian	500ng	20101112_RD_MaleVar_86M_Plasma_RNA_500ng_B1_T1
Variability	S1	W070510202359	female	Caucasian	500ng	20101108_RD_Maternal_NP_59F_S1_Plasma_RNA_500ng_B1_T1
Variability	S1	W070510990066	female	Caucasian	500ng	20101108_RD_Maternal_NP_66F_S1_Plasma_RNA_500ng_B1_T1
Variability	S1	W070510990077	female	Caucasian	500ng	20101108_RD_Maternal_NP_77F_S1_Plasma_RNA_500ng_B1_T1
Variability	S1	W070510202322	female	Caucasian	500ng	20101111_RD_Femalevar_22F_S1_Plasma_RNA_500ng_B1_T1
Variability	S1	W070510319844	female	Caucasian	500ng	20101111_RD_Femalevar_44F_S1_Plasma_RNA_500ng_B1_T1
Variability	S1	W070510319846	female	Caucasian	500ng	20101111_RD_Femalevar_46F_S1_Plasma_RNA_500ng_B1_T1
Variability	S1	W070510319858	female	Caucasian	500ng	20101111_RD_Femalevar_58F_S1_Plasma_RNA_500ng_B1_T1
Variability	S1	W070510319864	female	Caucasian	500ng	20101111_RD_Femalevar_64F_S1_Plasma_RNA_500ng_B1_T1
Variability	S1	W070510319865	female	Caucasian	500ng	20101111_RD_Femalevar_65F_S1_Plasma_RNA_500ng_B1_T1
Variability	S1	W070510215091	female	Caucasian	500ng	20101111_RD_Femalevar_91F_S1_Plasma_RNA_500ng_B1_T1
